# Supplementary material for: Decoding growth inhibitory associated pathways of xenometal–siderophore antibiotic conjugates in S. aureus
Source: Royal Society of Chemistry journal article supplement (doi:10.1039/d4sc08509d), 2025-01-01
Supplement: d4sc08509d1.xlsx [file d4sc08509d1.xlsx]

## Sheet: M-DFO-Cip in wt SA
conc (M)	Ciprofloxacin			DFO-CIP			Ga-DFO-CIP			Fe-DFO-CIP
0.0003	-0.0038	-0.0028	-0.0038	-0.0013	-0.0023	-0.0013	-0.0007	-0.0007	-0.0043	0.081	0.081	0.076
0.00015	-0.0028	-0.0028	-0.0038	-0.0033	-0.0033	-0.0033	-0.0027	-0.0027	-0.0017	0.204	0.211	0.222
7.5e-05	-0.0038	-0.0048	-0.0038	-0.0023	-0.0043	-0.0033	-0.0016	-0.0036	-0.0036	0.236	0.233	0.239
3.8e-05	-0.0048	-0.0038	-0.0038	-0.0023	-0.0033	-0.0033	-0.0027	-0.0037	-0.0037	0.229	0.226	0.226
1.9e-05	-0.0038	-0.0038	-0.0038	0.0647	0.0907	0.0827	-0.0037	-0.0037	-0.0037	0.231	0.203	0.253
9.4e-07	0.1362	0.1502	0.1362	0.0987	0.1337	0.1057	-0.0037	-0.0037	-0.0027	0.214	0.216	0.219
9.4e-08	0.1242	0.1652	0.1512	0.1147	0.1277	0.1417	0.1463	0.1363	0.1713	0.209	0.206	0.228
9.4e-09	0.1402	0.1612	0.1392	0.1267	0.1277	0.1157	0.1543	0.1703	0.2653	0.233	0.237	0.226
9.4e-10	0.1522	0.1932	0.1472	0.1307	0.1357	0.1067	0.1853	0.2053	0.2293	0.203	0.247	0.217
9.4e-11	0.1912	0.1772	0.1912	0.1307	0.1287	0.1527	0.2353	0.1953	0.2113	0.207	0.226	0.227
9.4e-12	0.1942	0.2272	0.1972	0.1877	0.1847	0.2157	0.2183	0.2203	0.2233	0.213	0.239	0.209

## Sheet: M-LDFC-Cip in wt SA
conc (M)	CIP			Ga-LDFC-CIP			LDFC-CIP			Fe-LDFC-CIP
0.0003	0.021	0.023	0.024	0.006	0.005	0.005	0.014	0.018	0.014	0.002	0.003	0.005
0.00015	0.007	0.001	0.002	0.024	0.013	0.021	0.013	0.014	0.012	0.003	0.001	0.005
7.5e-05	0.009	0.012	0.012	0.023	0.037	0.035	0.033	0.037	0.037	0.011	0.011	0.011
3.8e-05	0.007	0.011	0.01	0.024	0.039	0.028	0.031	0.042	0.039	0.042	0.052	0.059
1.9e-05	0.013	0.011	0.012	0.026	0.018	0.026	0.031	0.034	0.024	0.101	0.103	0.141
9.4e-07	0.009	0.009	0.011	0.064	0.053	0.029	0.025	0.029	0.034	0.136	0.175	0.119
9.4e-08	0.216	0.206	0.193	0.011	0.012		0.122	0.151	0.091	0.209	0.194	0.183
9.4e-09	0.267	0.257	0.264	0.194	0.212	0.205	0.216	0.211	0.238	0.254	0.268	0.255
9.4e-10	0.253	0.272	0.267	0.213	0.222	0.238	0.238	0.251	0.243	0.284	0.279	0.266
9.4e-11	0.244	0.266	0.246	0.242	0.247	0.253	0.244	0.263	0.237	0.261	0.275	0.266
9.4e-12	0.25	0.27	0.253	0.245	0.255	0.253	0.251	0.254	0.249	0.247	0.277	0.282

## Sheet: M-DFO-Amp in wt SA
conc (M)	ciprofloxacin			ampicillin			Fe-DA1			Ga-DA1			DA1
3e-05	-0.0025	-0.0025	-0.0035	-0.0035	-0.0035	-0.0035	0.1765	0.1765	0.1735	-0.0004	-0.0014	-0.0014	0.564	0.323	0.411
1.5e-05	-0.0015	-0.0035	-0.0035	-0.0025	-0.0025	-0.0025	0.2275	0.1985	0.2345	-0.0004	-0.0014	-0.0014	0.451	0.384	0.328
7.5e-06	-0.0035	-0.0025	-0.0035	-0.0035	-0.0015	-0.0035	0.2625	0.1865	0.1995	0.0196	0.0396	0.0356	0.328	0.3	0.291
3.8e-06	0.0085	-0.0025	-0.0025	-0.0015	-0.0025	-0.0035	0.2285	0.1675	0.2095	0.1026	0.1276	0.1146	0.276	0.301	0.316
1.9e-06	0.1785	0.0615	0.0325	-0.0015	-0.0015	-0.0025	0.2775	0.1985	0.1965	0.1456	0.1606	0.1866	0.32	0.246	0.29
9.4e-07	0.2505	0.2645	0.2515	0.0525	0.1355	0.1035	0.2035	0.2095	0.1965	0.2176	0.1876	0.1966	0.282	0.222	0.272
9.4e-08	0.2495	0.2515	0.2655	0.1535	0.1895	0.1655	0.2025	0.2045	0.2085	0.2666	0.1956	0.1916	0.265	0.304	0.273
9.4e-09	0.2445	0.2245	0.2575	0.1885	0.1815	0.1985	0.2465	0.2095	0.2135	0.2496	0.2156	0.1996	0.325	0.235	0.27
9.4e-10	0.2455	0.2225	0.2575	0.2095	0.2465	0.2265	0.2015	0.2385	0.1965	0.2246	0.2076	0.2116	0.194	0.196	0.262
9.4e-11	0.2405	0.2285	0.2165	0.2265	0.2445	0.2265	0.2345	0.2145	0.1935	0.2316	0.1936	0.2016	0.204	0.234	0.249
9.4e-12	0.2655	0.2765	0.2695	0.2925	0.2985	0.2835	0.2475	0.2485	0.2395	0.2426	0.2526	0.2326	0.257	0.302	0.398

## Sheet: M-DFO-Cip in SACip-Res
conc (M)	ciprofloxacin			Fe-D5			Ga-D5			D5			GaD1
3e-05	-0.0002	-0.0002	-0.0023	0.2278	0.2788	0.2678	-0.0063	-0.0023	0.0057	0.1734	0.2124	0.2214	0.0035	0.0015	0.0055
1.5e-05	-0.0002	-0.0002	-0.0023	0.2348	0.2038	0.2228	0.3657	0.3547	0.3887	0.2074	0.2104	0.1804	0.0015	0.0035	0.0005
7.5e-06	0.0008	-0.0012	-0.0023	0.2038	0.2198	0.2178	0.3637	0.4867	0.4427	0.2044	0.1664	0.1794	0.0005	0.0015	0.0005
3.8e-06	-0.0002	0.0008	-0.0012	0.2088	0.2398	0.2138	0.2627	0.4267	0.3597	0.2244	0.1744	0.2094	-0.0005	0.0015	0.0005
1.9e-06	-0.0002	-0.0002	-0.0012	0.1838	0.1908	0.2358	0.3497	0.3967	0.3517	0.2014	0.1974	0.2014	0.0585	0.0635	0.0515
9.4e-07	0.2118	0.1538	0.1988	0.2328	0.2288	0.2508	0.4457	0.3547	0.3477	0.1904	0.1904	0.2214	0.1805	0.1675	0.1815
9.4e-08	0.1908	0.1858	0.1958	0.2468	0.2188	0.2478	0.4257	0.4087	0.3567	0.1884	0.2164	0.2114	0.1755	0.1795	0.1535
9.4e-09	0.1948	0.1908	0.1978	0.2498	0.2228	0.2218	0.4887	0.4247	0.4107	0.2394	0.2074	0.2634	0.1755	0.1795	0.1625
9.4e-10	0.1688	0.1728	0.2058	0.2048	0.1958	0.2028	0.4757	0.4867	0.4747	0.2054	0.2164	0.2484	0.1885	0.1765	0.1735
9.4e-11	0.1988	0.1778	0.1968	0.1878	0.2358	0.2078	0.5117	0.4177	0.4637	0.2194	0.2094	0.2064	0.1955	0.1685	0.1835
9.4e-12	0.2418	0.2468	0.2568	0.2388	0.2648	0.3058	0.4477	0.3537	0.3017	0.2524	0.2544	0.2484	0.2185	0.2185	0.2185

## Sheet: M-LDFC-Cip in SACip-Res
conc (M)	ciprofloxacin			Fe-D1			Ga-D1			D1
3e-05	-0.0025	-0.0035	-0.0035	0.2033	0.1473	0.1573	-0.0002	-0.0002	-0.0022	-0.0034	-0.0034	-0.0034
1.5e-05	-0.0025	-0.0035	-0.0045	0.2683	0.2423	0.2463	-0.0002	-0.0002	-0.0022	-0.0004	-0.0034	-0.0034
7.5e-06	-0.0045	-0.0025	-0.0045	0.2643	0.2763	0.2473	-0.0012	-0.0022	-0.0022	0.0186	-0.0024	0.1116
3.8e-06	-0.0025	-0.0025	-0.0045	0.2573	0.2803	0.2393	-0.0002	0.0008	-0.0012	0.1076	0.0596	-0.0024
1.9e-06	-0.0015	0.0115	-0.0025	0.2343	0.2503	0.2473	0.0008	0.0008	-0.0012	0.0576	0.1286	0.0596
9.4e-07	0.2235	0.2625	0.2325	0.1773	0.3013	0.2623	0.1698		0.2418	0.1336	0.1426	0.1276
9.4e-08	0.2155	0.2305	0.2035	0.1833	0.2333	0.2323	0.057	0.139	0.08	0.1836	0.1996	0.2266
9.4e-09	0.2275	0.2455	0.2515	0.1953	0.2533	0.2753	0.1768		0.2578	0.1896	0.2236	0.2556
9.4e-10	0.2145	0.2145	0.2475	0.1693	0.2063	0.2333	0.2048	0.0748	0.0098	0.1596	0.1966	0.2246
9.4e-11	0.2235	0.2165	0.2085	0.1493	0.1663	0.1873	0.2398	0.0458	0.1268	0.1656	0.1856	0.2036
9.4e-12	0.2415	0.2475	0.2195	0.1183	0.1463	0.1953	0.2668	0.2778	0.1958	0.1536	0.2176	0.1876

## Sheet: M-DFO-Amp in SACip-Res
conc (M)	ampicillin			DFO-Amp			Fe-DFO-Amp			Ga-DFO-Amp
3e-05	-0.0027	-0.0037	-0.0037	0.2562	0.2092	0.2152	0.1905	0.1805	0.1965	-0.0046	-0.0046	-0.0056
1.5e-05	-0.0017	-0.0037	-0.0037	0.2302	0.2132	0.2132	0.2195	0.1425	0.1515	-0.0016	-0.0046	-0.0046
7.5e-06	-0.0037	-0.0017	-0.0037	0.2162	0.2022	0.2102	0.2365	0.2145	0.1585	0.0474	0.1414	0.1334
3.8e-06	-0.0017	-0.0027	-0.0037	0.2002	0.1952	0.1852	0.2235	0.2085	0.2095	0.1664	0.1474	0.1414
1.9e-06	-0.0017	-0.0017	-0.0027	0.1872	0.1942	0.1682	0.2645	0.2155	0.1785	0.1664	0.1474	0.1414
9.4e-07	0.0263	0.1603	0.1383	0.1832	0.1822	0.1752	0.2385	0.2435	0.2195	0.2184	0.2124	0.2004
9.4e-08	0.1593	0.1723	0.1793	0.1942	0.1852	0.2022	0.2405	0.2525	0.2295	0.2504	0.2274	0.2164
9.4e-09	0.1623	0.1763	0.1873	0.1802	0.1822	0.1742	0.2335	0.2615	0.2505	0.2474	0.2284	0.2224
9.4e-10	0.1763	0.1803	0.1933	0.1722	0.1772	0.1682	0.2095	0.2725	0.2795	0.2554	0.2254	0.2354
9.4e-11	0.1773	0.1843	0.1943	0.1672	0.1652	0.1902	0.2215	0.2675	0.2485	0.3184	0.2794	0.1774
9.4e-12	0.2393	0.2493	0.2693	0.2052	0.1522	0.2142	0.2795	0.2905	0.3025	0.2434	0.2774	0.2664

## Sheet: M-LDFC-Cip in SAGa-DFO-Cip-Res
conc (M)	ciprofloxacin			Fe-D5			Ga-D5			D5			GaD1
3e-05	-0.0002	-0.0002	-0.0023	0.2278	0.2788	0.2678	-0.0063	-0.0023	0.0057	0.1734	0.2124	0.2214	0.0035	0.0015	0.0055
1.5e-05	-0.0002	-0.0002	-0.0023	0.2348	0.2038	0.2228	0.3657	0.3547	0.3887	0.2074	0.2104	0.1804	0.0015	0.0035	0.0005
7.5e-06	0.0008	-0.0012	-0.0023	0.2038	0.2198	0.2178	0.3637	0.4867	0.4427	0.2044	0.1664	0.1794	0.0005	0.0015	0.0005
3.8e-06	-0.0002	0.0008	-0.0012	0.2088	0.2398	0.2138	0.2627	0.4267	0.3597	0.2244	0.1744	0.2094	-0.0005	0.0015	0.0005
1.9e-06	-0.0002	-0.0002	-0.0012	0.1838	0.1908	0.2358	0.3497	0.3967	0.3517	0.2014	0.1974	0.2014	0.0585	0.0635	0.0515
9.4e-07	0.2118	0.1538	0.1988	0.2328	0.2288	0.2508	0.4457	0.3547	0.3477	0.1904	0.1904	0.2214	0.1805	0.1675	0.1815
9.4e-08	0.1908	0.1858	0.1958	0.2468	0.2188	0.2478	0.4257	0.4087	0.3567	0.1884	0.2164	0.2114	0.1755	0.1795	0.1535
9.4e-09	0.1948	0.1908	0.1978	0.2498	0.2228	0.2218	0.4887	0.4247	0.4107	0.2394	0.2074	0.2634	0.1755	0.1795	0.1625
9.4e-10	0.1688	0.1728	0.2058	0.2048	0.1958	0.2028	0.4757	0.4867	0.4747	0.2054	0.2164	0.2484	0.1885	0.1765	0.1735
9.4e-11	0.1988	0.1778	0.1968	0.1878	0.2358	0.2078	0.5117	0.4177	0.4637	0.2194	0.2094	0.2064	0.1955	0.1685	0.1835
9.4e-12	0.2418	0.2468	0.2568	0.2388	0.2648	0.3058	0.4477	0.3537	0.3017	0.2524	0.2544	0.2484	0.2185	0.2185	0.2185

## Sheet: M-DFO-Amp in SAGa-DFO-Cip-Res
conc (M)	ampicillin			DA1			FeA1			GaA1
3e-05	-0.0025	-0.0035	-0.0035	0.198	0.178	0.174	0.1763	0.1803	0.1863	-0.0084	-0.0084	-0.0094
1.5e-05	-0.0025	-0.0025	-0.0035	0.205	0.18	0.185	0.2093	0.1723	0.1813	-0.0064	-0.0084	-0.0094
7.5e-06	-0.0035	-0.0015	-0.0035	0.188	0.187	0.163	0.2073	0.1963	0.1903	0.0086	0.0146	0.0006
3.8e-06	-0.0015	-0.0025	-0.0045	0.177	0.188	0.171	0.2433	0.2203	0.2133	0.1236	0.1256	0.1236
1.9e-06	-0.0015	-0.0025	-0.0025	0.163	0.164	0.184	0.2533	0.2183	0.2113	0.1436	0.1396	0.1576
9.4e-07	0.0815	0.1205	0.1335	0.175	0.182	0.197	0.1893	0.2373	0.2063	0.1866	0.1776	0.2036
9.4e-08	0.1645	0.1835	0.1855	0.158	0.189	0.171	0.1943	0.2183	0.2093	0.2136	0.2076	0.2166
9.4e-09	0.1745	0.2175	0.2315	0.18	0.162	0.173	0.2183	0.2353	0.2243	0.2386	0.2056	0.2236
9.4e-10	0.1995	0.1915	0.2155	0.185	0.182	0.174	0.1993	0.2153	0.2303	0.2266	0.1996	0.2066
9.4e-11	0.2135	0.2025	0.1875	0.216	0.153	0.181	0.2103	0.2213	0.1883	0.2336	0.2156	0.2286
9.4e-12	0.2625	0.2635	0.2575	0.233	0.22	0.229	0.2863	0.2843	0.2923	0.2436	0.2246	0.2656

## Sheet: M-DFO-Cip in SAGa-LDFC-Cip-Res
conc (M)	ciprofloxacin			Fe-D1			Ga-D1			D1
3e-05	-0.0025	-0.0035	-0.0035	0.2033	0.1473	0.1573	-0.0002	-0.0002	-0.0022	-0.0034	-0.0034	-0.0034
1.5e-05	-0.0025	-0.0035	-0.0045	0.2683	0.2423	0.2463	-0.0002	-0.0002	-0.0022	-0.0004	-0.0034	-0.0034
7.5e-06	-0.0045	-0.0025	-0.0045	0.2643	0.2763	0.2473	-0.0012	-0.0022	-0.0022	0.0186	-0.0024	0.1116
3.8e-06	-0.0025	-0.0025	-0.0045	0.2573	0.2803	0.2393	-0.0002	0.0008	-0.0012	0.1076	0.0596	-0.0024
1.9e-06	-0.0015	0.0115	-0.0025	0.2343	0.2503	0.2473	0.0008	0.0008	-0.0012	0.0576	0.1286	0.0596
9.4e-07	0.2235	0.2625	0.2325	0.1773	0.3013	0.2623	0.1698		0.2418	0.1336	0.1426	0.1276
9.4e-08	0.2155	0.2305	0.2035	0.1833	0.2333	0.2323	0.057	0.139	0.08	0.1836	0.1996	0.2266
9.4e-09	0.2275	0.2455	0.2515	0.1953	0.2533	0.2753	0.1768		0.2578	0.1896	0.2236	0.2556
9.4e-10	0.2145	0.2145	0.2475	0.1693	0.2063	0.2333	0.2048	0.0748	0.0098	0.1596	0.1966	0.2246
9.4e-11	0.2235	0.2165	0.2085	0.1493	0.1663	0.1873	0.2398	0.0458	0.1268	0.1656	0.1856	0.2036
9.4e-12	0.2415	0.2475	0.2195	0.1183	0.1463	0.1953	0.2668	0.2778	0.1958	0.1536	0.2176	0.1876

## Sheet: M-DFO-Amp in SAGa-LDFC-Cip-Res
conc (M)	ampicillin			DFO-Amp			Fe-DFO-Amp			Ga-DFO-Amp
3e-05	-0.0017	-0.0017	-0.0037	0.2959	0.2119	0.3279	0.4653	0.2783	0.2973	0.0083	0.0093	0.0073
1.5e-05	-0.0028	-0.0017	-0.0028	0.3329	0.2789	0.2619	0.3003	0.2383	0.2783	0.1053	0.0693	0.0863
7.5e-06	-0.0017	-0.0028	-0.0037	0.2279	0.2449	0.2619	0.2593	0.2283	0.2493	0.1183	0.1483	0.1413
3.8e-06	-0.0028	-0.0028	-0.0028	0.2309	0.2539	0.2669	0.2763	0.2633	0.2453	0.1463	0.1663	0.1593
1.9e-06	-0.0028	-0.0037	-0.0028	0.2739	0.2289	0.2849	0.2413	0.2153	0.2673	0.1623	0.1923	0.2123
9.4e-07	0.0523	0.0533	0.0613	0.3049	0.2649	0.2459	0.1963	0.2263	0.2253	0.2263	0.2423	0.2293
9.4e-08	0.2113	0.1483	0.1773	0.2609	0.2869	0.2649	0.2273	0.2263	0.2353	0.2413	0.2453	0.2413
9.4e-09	0.2623	0.2553	0.2713	0.2899	0.2159	0.3129	0.2323	0.2363	0.2353	0.2413	0.2393	0.2493
9.4e-10	0.2573	0.2413	0.2583	0.2539	0.2189	0.2629	0.2293	0.2473	0.2453	0.2373	0.2173	0.2573
9.4e-11	0.2573	0.2883	0.2563	0.2519	0.2689	0.2529	0.2653	0.2543	0.2743	0.2403	0.2623	0.2493
9.4e-12	0.3393	0.3243	0.3503	0.3859	0.2799	0.4339	0.2913	0.2903	0.2713	0.4133	0.3113	0.3363
