# Supplementary material for: Decoding growth inhibitory associated pathways of xenometal–siderophore antibiotic conjugates in S. aureus
Source: Royal Society of Chemistry journal article supplement (doi:10.1039/d4sc08509d), 2025-01-01
Supplement: d4sc08509d2.xlsx [file d4sc08509d2.xlsx]

## Sheet: DGE Resistant strains
Genes	CIP-Res	SAGaDFO-Cip-Res	SAGaLDFC-Cip-Res
yesN	1.26244	3.04202	0
typA	1.07479	1.6571	2.03997
ompR	1.13583	0.929441	1.77504
purH	1.19573	0.767218	-0.858334
purL	1.20145	0.703709	-0.577165
pucG	-1.47796	-5.99012	-6.65297
fdh	1.47319	0.0856593	-0.755869
hslU	1.38098	1.52688	1.65368
appB	2.13745	2.11157	-0.266649
lysP	-1.4449	-3.63779	-3.36091
azlC	-1.42759	-3.27642	-4.61558
gltD	-1.5096	-4.82201	-5.08072
ald	3.27414	5.98545	3.96679
hisH	0.0312059	-6.05388	-6.56538
hisM	-1.37453	-7.06937	-6.86394
hisZ	-1.55555	-10.8095	-11.6628
argO	-0.943247	-4.50036	-5.03578
hisB	-0.0415797	-6.78394	-7.77859
glnQ	-1.47959	-6.28438	-6.31803
gltB	-1.19291	-6.66816	-7.40378
yuiF	-0.856457	-5.65305	-7.68584
hisL	-0.0156862	-5.29952	-5.54621
rhbC	1.56867	4.9737	-0.309529
efeO	-1.6933	-3.77148	-4.0905
sbnB	2.13593	4.25519	0.0817589
sbnC	2.35985	5.20612	0.4065
sbnF	1.58809	5.01892	0.179087
ftn	-1.68751	-5.63454	-1.83343
isdG	0.681939	7.6804	2.99488
fn3k	1.4548	1.2016	1.64509
rhaT	-1.18518	-2.02355	-2.00449
ycjR	1.5375	3.46967	2.58075
rhmA	2.19964	5.48486	0.876902
rpIN	2.32987	3.26325	2.95743
rpsS	2.12128	3.1227	2.45492
rpsC	2.30267	3.34853	3.5225
rplE	2.36968	3.40823	3.53014
rpsE	1.97522	2.85453	2.63232
rplD	1.65148	2.99148	3.07008
rpsQ	2.1046	3.24689	3.07117
rplP	2.12041	3.16108	3.48903
rplF	1.86053	2.84136	2.99833
rplB	1.86302	3.18041	3.3432
rpsH	2.00905	3.03811	2.82178
rplR	2.03441	3.04612	3.24528
rplX	2.15377	3.27433	3.52244
rplC	1.60492	3.20753	2.84391
rimL	-1.17838	-5.27931	-7.08712
rplJ	1.1961	3.66444	4.27317

## Sheet: DGE M-DFO-Cip in wt SA
Genes	CIP	DFO-Cip	FeDFO-Cip	GaDFO-Cip
pyrP	3.07044	3.09009	2.71293	2.51659
pyrB	3.12482	3.09009	2.99275	2.43255
pyrC	2.84319	2.85916	2.8917	2.26937
pyrAB	2.23174	0	1.92633	1.61131
pyrF	2.13109	0.787908	1.92733	1.53184
pyrE	1.87492	1.73748	1.41431	1.34291
carA	2.5065	2.5787	2.50056	1.97104
xprT	0.150828	3.14206	0.0745082	0.638318
umuC	1.75626	2.20007	1.94091	2.93766
ctsR	0.913356	0.872778	1.52792	0.358956
lexA	0.731736	0.803642	0.86187	1.44866
rpls	-0.14261	0.346457	-0.373661	-0.441642
ilvA	2.11628	0.402841	1.73724	1.66733
Fdh	-0.866486	-1.32932	-0.671755	-0.872409
narH	0.998236	0.428635	0.562256	0.0754163
narG	0.928288	-0.640444	0.547358	-0.0892502
nasD	0.771568	0.480627	0.538221	0.254182
nasF	1.00936	-0.291754	0.471501	0.400265
narI	0.364043	0.323882	0.325863	0.505866
narT	1.56143	0	1.01866	0.557592
cbiX	0.673654	0.0147524	0.614115	0.483634
proP	-0.734113	-1.13931	-0.753564	-1.15218
lrgB	0	1.55831	1.66632	1.23009
emrB	-0.0378217	-1.95704	0.136782	-0.0841344
ftnA	0.217767	0.788769	0.125894	-0.360685
fecD	0.198172	0	-0.431545	0.131427
feuC	0.100876	0.331739	-0.535607	0.0421826
yusV	0.0504485	-0.234008	-0.721432	-0.127989
sirA	-0.563819	-0.6068	-1.12907	-0.376308
fhuD2	-0.47777	-0.432335	-1.08449	-0.450384
yhfQ	-0.385702	0.323758	-0.728383	-0.268504
iucA	-0.140362	-0.0523542	-0.656161	0.118213
iucC	-0.457064	0.034426	-1.26379	0.0266508
sbnB	-0.83221	0.059499	-1.66101	-0.681171
sbnC	-0.600476	-0.25396	-1.27179	-0.353981
sbnE	-0.511962	-0.0140702	-1.26546	-0.0618213
sbnH	-0.443747	0.570327	-1.19947	0.194065
isdD	-0.529581	0.3064	-1.21736	-0.51214
isdC	-0.552617	-0.0588867	-1.30359	-0.529027
isdE	-0.55546	0.0977008	-1.10279	-0.431738
isdB	-0.503526	-0.283858	-1.19649	-0.221516
hrtA	-0.234234	-0.0081511	-0.190714	-0.654001
hrtB	0.347964	-0.134187	0.38384	-0.504417
uhpT	-1.53889	-1.32825	-1.61453	-1.1909
treB	1.4944	1.10331	1.11616	1.00443
tpiA	1.19754	0.323996	1.2954	0.263857

## Sheet: DGE M-LDFC-Cip in wt SA
Genes	CIP	LDFC-Cip	FeLDFC-Cip	GaLDFC-Cip
pyrP	3.07044	2.9055	2.10853	2.27233
pyrB	3.12482	3.0723	2.18848	2.39643
pyrC	2.84319	2.83334	2.15784	2.01454
pyrAB	2.23174	2.30647	1.75746	1.61514
pyrF	2.13109	2.31458	2.01587	1.6648
pyrE	1.87492	2.01828	1.76088	1.64956
carA	2.5065	2.60292	1.9107	1.75561
xprT	0.150828	-0.496628	-0.0266934	0.509337
umuC	1.75626	2.59047	1.27769	0.961358
ctsR	0.913356	0.775575	0.683433	0.55234
lexA	0.731736	1.10466	0.575112	0.476264
rpls	-0.14261	0.0252914	-0.292399	-0.462912
ilvA	2.11628	1.66303	1.43082	1.09582
Fdh	-0.866486	-2.30468	-1.31648	-0.582098
narH	0.998236	1.26165	1.54391	1.48663
narG	0.928288	1.2038	1.80543	1.51281
nasD	0.771568	0.73259	0.782188	0.553797
nasF	1.00936	0.968451	0.841921	0.577173
narI	0.364043	0.205912	0.396904	-0.0515679
narT	1.56143	1.6146	1.94934	1.31222
cbiX	0.673654	0.600179	0.716483	0.368567
proP	-0.734113	-0.744205	-0.364267	-0.407593
lrgB	0	0.638855	1.3451	0.505493
emrB	-0.0378217	-0.163414	-0.037519	-0.170086
ftnA	0.217767	0.455375	0.432883	0.533637
fecD	0.198172	-0.0561592	-0.360339	-0.22194
feuC	0.100876	-0.147592	-0.401224	-0.274735
yusV	0.0504485	-0.106428	-0.559537	-0.395948
sirA	-0.563819	-0.636191	-0.860609	-0.285929
fhuD2	-0.47777	-0.403637	-0.682521	-0.30589
yhfQ	-0.385702	-0.393181	-0.458776	-0.246222
iucA	-0.140362	-0.392213	-0.518755	-0.215994
iucC	-0.457064	-0.898543	-1.23191	-0.708327
sbnB	-0.83221	-1.32829	-1.74535	-0.791861
sbnC	-0.600476	-1.18194	-1.459	-0.816792
sbnE	-0.511962	-0.902134	-1.32951	-0.689639
sbnH	-0.443747	-0.836228	-1.17252	-0.558921
isdD	-0.529581	-0.904974	-1.08458	-0.252403
isdC	-0.552617	-0.784566	-1.01085	-0.217303
isdE	-0.55546	-0.773997	-1.04549	-0.356819
isdB	-0.503526	-1.11909	-1.74695	-0.510713
hrtA	-0.234234	-0.136898	-0.123142	-0.375897
hrtB	0.347964	0.187056	0.658407	-0.310901
uhpT	-1.53889	-0.441761	-0.0511924	-0.193733
treB	1.4944	1.69184	1.13882	0.555271
tpiA	1.19754	1.66282	1.15119	0.776872
