# Supplementary material for: Decoding growth inhibitory associated pathways of xenometal–siderophore antibiotic conjugates in S. aureus
Source: Royal Society of Chemistry journal article supplement (doi:10.1039/d4sc08509d), 2025-01-01
Supplement: d4sc08509d4.xlsx [file d4sc08509d4.xlsx]

## Sheet: SA wt
CHROM	POS	ID	REF	ALT	QUAL	TYPE	SAWT1.AD
NC_007795.1	5543	.	G	A	30514.1	SNP	0,1151
NC_007795.1	20307	.	TTAAAGG	T	68274	INDEL	162513
NC_007795.1	24938	.	G	A	38130.1	SNP	0,1350
NC_007795.1	31501	.	G	A	5258.06	SNP	0,166
NC_007795.1	45635	.	G	A	7773.06	SNP	0,238
NC_007795.1	69311	.	G	A	2460.06	SNP	0,83
NC_007795.1	91356	.	G	A	7677.06	SNP	0,183
NC_007795.1	91371	.	G	A	7798.06	SNP	0,183
NC_007795.1	109988	.	G	A	1423.06	SNP	0,50
NC_007795.1	122510	.	G	A	3286.06	SNP	0,97
NC_007795.1	132528	.	G	A	2191.06	SNP	0,74
NC_007795.1	132770	.	G	A	4314.06	SNP	0,134
NC_007795.1	168179	.	G	A	4339.06	SNP	0,137
NC_007795.1	174414	.	G	A	82777.1	SNP	22721
NC_007795.1	175391	.	G	A	43391.1	SNP	0,1486
NC_007795.1	179583	.	G	A	72638.1	SNP	0,2247
NC_007795.1	222224	.	G	A	231892	SNP	0,6845
NC_007795.1	222782	.	T	C	9014.06	SNP	0,338
NC_007795.1	247635	.	G	A	53092.1	SNP	0,1643
NC_007795.1	250141	.	G	A	71897.1	SNP	0,2031
NC_007795.1	264838	.	G	T	489.64	SNP	79,28
NC_007795.1	284071	.	G	A	1571.06	SNP	0,55
NC_007795.1	289916	.	A	G	2169.64	SNP	44,55
NC_007795.1	292328	.	G	A	24832.6	SNP	10591015
NC_007795.1	292840	.	G	A	20638.1	SNP	3672
NC_007795.1	293057	.	A	C	1686.64	SNP	427,72
NC_007795.1	293061	.	A	AG	1699.6	INDEL	423,72
NC_007795.1	293525	.	A	T	6741.64	SNP	321185
NC_007795.1	293526	.	A	G	5656.64	SNP	322183
NC_007795.1	319572	.	G	A	2002.06	SNP	0,71
NC_007795.1	344682	.	G	A	21449.1	SNP	0,712
NC_007795.1	372836	.	G	A	78739.1	SNP	22634
NC_007795.1	383015	.	G	A	61060.1	SNP	0,1909
NC_007795.1	393449	.	T	C	591.06	SNP	0,18
NC_007795.1	404419	.	G	C	195.64	SNP	44,8
NC_007795.1	404420	.	T	C	195.64	SNP	44,8
NC_007795.1	422654	.	T	A	150.64	SNP	17,5
NC_007795.1	451622	.	T	G	57.64	SNP	7,3
NC_007795.1	452026	.	G	T	203.64	SNP	13,8
NC_007795.1	452035	.	G	T	179.64	SNP	21,8
NC_007795.1	482303	.	T	C	6098.06	SNP	0,187
NC_007795.1	496601	.	A	T	51.64	SNP	5,3
NC_007795.1	497164	.	G	T	99.64	SNP	4,17
NC_007795.1	497302	.	C	A	36.64	SNP	12,5
NC_007795.1	497308	.	C	A	36.64	SNP	12,5
NC_007795.1	497791	.	G	T	108.31	SNP	1,17
NC_007795.1	506465	.	AAAGAAATTGAAC	A	67570	INDEL	0,1685
NC_007795.1	590401	.	CG	C	876.03	INDEL	0,22
NC_007795.1	621570	.	C	T	14400.1	SNP	0,507
NC_007795.1	692310	.	A	G	29.64	SNP	12,2
NC_007795.1	692311	.	A	G	29.64	SNP	12,2
NC_007795.1	769190	.	C	T	41676.1	SNP	0,1193
NC_007795.1	837006	.	G	A	40778.1	SNP	0,1164
NC_007795.1	841103	.	G	T	83304.1	SNP	192809
NC_007795.1	841139	.	G	T	86448.1	SNP	42922
NC_007795.1	878986	.	T	A	56047.1	SNP	21788
NC_007795.1	929948	.	G	A	5617.06	SNP	2182
NC_007795.1	931547	.	G	A	13509.1	SNP	0,398
NC_007795.1	972920	.	G	A	199296	SNP	15166
NC_007795.1	1002213	.	G	A	4410.06	SNP	0,129
NC_007795.1	1026014	.	G	A	113796	SNP	0,3193
NC_007795.1	1053759	.	G	A	3521.06	SNP	0,116
NC_007795.1	1104615	.	G	A	196074	SNP	0,5339
NC_007795.1	1110377	.	G	T	8646.06	SNP	2305
NC_007795.1	1141109	.	G	A	5946.64	SNP	47236
NC_007795.1	1160513	.	G	A	4007.06	SNP	0,108
NC_007795.1	1160531	.	A	G	5050.06	SNP	0,150
NC_007795.1	1166424	.	G	A	57554.1	SNP	0,1849
NC_007795.1	1173181	.	G	A	12675.1	SNP	0,444
NC_007795.1	1180030	.	G	A	27479.1	SNP	0,797
NC_007795.1	1187108	.	G	A	31776.1	SNP	0,1029
NC_007795.1	1212234	.	G	A	1574.06	SNP	0,48
NC_007795.1	1215915	.	G	A	41081.1	SNP	0,1353
NC_007795.1	1229542	.	G	A	4148.06	SNP	0,127
NC_007795.1	1235001	.	G	A	118698	SNP	0,3654
NC_007795.1	1288087	.	G	A	178230	SNP	54716
NC_007795.1	1313034	.	G	A	14419.1	SNP	0,468
NC_007795.1	1340779	.	C	T	93752.1	SNP	63058
NC_007795.1	1357562	.	C	T	115608	SNP	23362
NC_007795.1	1376022	.	A	G	29.64	SNP	2,2
NC_007795.1	1396723	.	G	A	4934.06	SNP	0,148
NC_007795.1	1403320	.	G	A	1407.06	SNP	0,47
NC_007795.1	1461625	.	C	T	173.97	SNP	0,6
NC_007795.1	1474477	.	G	C	378.64	SNP	17,14
NC_007795.1	1474480	.	A	C	381.64	SNP	16,14
NC_007795.1	1478654	.	G	A	681.06	SNP	0,20
NC_007795.1	1479371	.	T	C	367.64	SNP	15,10
NC_007795.1	1479374	.	T	TCCACC	367.6	INDEL	15,10
NC_007795.1	1491260	.	TG	T	1513.6	INDEL	17,42
NC_007795.1	1491475	.	GC	G	3807.03	INDEL	0,102
NC_007795.1	1532073	.	G	A	63939.1	SNP	0,2019
NC_007795.1	1624372	.	G	A	159247	SNP	14421
NC_007795.1	1645376	.	G	A	89697.1	SNP	42537
NC_007795.1	1653482	.	G	A	7512.06	SNP	0,222
NC_007795.1	1656539	.	C	T	30690	SNP	11062
NC_007795.1	1663834	.	G	A	4064.06	SNP	0,126
NC_007795.1	1683491	.	T	C	42203.1	SNP	0,1225
NC_007795.1	1684798	.	G	A	7027.06	SNP	0,235
NC_007795.1	1688653	.	G	A	143134	SNP	0,4080
NC_007795.1	1733515	.	G	T	120013	SNP	13358
NC_007795.1	1733572	.	A	G	159602	SNP	14672
NC_007795.1	1779267	.	G	A	55817.1	SNP	31785
NC_007795.1	1822604	.	CTAAATAATCG	C	115.6	INDEL	43,6
NC_007795.1	1822617	.	C	G	115.64	SNP	43,6
NC_007795.1	1822779	.	G	A	2129.06	SNP	0,58
NC_007795.1	1902081	.	C	T	63.64	SNP	4,2
NC_007795.1	1902874	.	T	A	160.64	SNP	30,10
NC_007795.1	1905892	.	G	A	240.71	SNP	1,6
NC_007795.1	1937294	.	AT	A	36.6	INDEL	7,2
NC_007795.1	1950166	.	A	C	94.64	SNP	36,5
NC_007795.1	1950167	.	A	G	94.64	SNP	36,5
NC_007795.1	1950168	.	A	ATCT	94.6	INDEL	36,5
NC_007795.1	1977606	.	C	T	6176.06	SNP	0,209
NC_007795.1	1980311	.	C	T	12281.1	SNP	0,387
NC_007795.1	1981053	.	A	G	28355.1	SNP	0,815
NC_007795.1	2021643	.	C	T	17151.1	SNP	0,540
NC_007795.1	2035907	.	A	AT	1196.6	INDEL	249,98
NC_007795.1	2035914	.	C	T	9286.06	SNP	0,360
NC_007795.1	2046616	.	A	T	183.64	SNP	48,8
NC_007795.1	2046618	.	G	A	183.64	SNP	48,8
NC_007795.1	2049518	.	C	T	978.06	SNP	0,32
NC_007795.1	2053220	.	T	A	129.96	SNP	0,5
NC_007795.1	2054835	.	T	A	37.32	SNP	0,2
NC_007795.1	2066007	.	C	T	914.06	SNP	0,27
NC_007795.1	2066758	.	C	T	1157.06	SNP	0,36
NC_007795.1	2085362	.	C	T	3092.06	SNP	0,103
NC_007795.1	2087725	.	A	T	53814.1	SNP	0,1600
NC_007795.1	2124374	.	C	T	78.32	SNP	0,2
NC_007795.1	2124375	.	CT	C	78.28	INDEL	0,2
NC_007795.1	2152152	.	C	T	125045	SNP	0,3641
NC_007795.1	2166163	.	G	C	50608.1	SNP	0,1575
NC_007795.1	2166183	.	C	A	43517.1	SNP	141284
NC_007795.1	2221850	.	C	A	8062.06	SNP	0,248
NC_007795.1	2242113	.	T	G	37.32	SNP	0,2
NC_007795.1	2260129	.	G	A	11204.1	SNP	0,368
NC_007795.1	2296653	.	TG	T	67123	INDEL	0,1659
NC_007795.1	2351105	.	C	T	556.06	SNP	0,19
NC_007795.1	2383630	.	G	T	57095.1	SNP	0,1837
NC_007795.1	2383660	.	G	T	73452.1	SNP	0,2206
NC_007795.1	2446246	.	C	T	1628.06	SNP	0,50
NC_007795.1	2446630	.	C	T	52540.1	SNP	11213
NC_007795.1	2446641	.	T	A	53836.1	SNP	11248
NC_007795.1	2458198	.	G	A	5596.06	SNP	0,172
NC_007795.1	2479839	.	G	A	35970.1	SNP	0,1229
NC_007795.1	2525469	.	C	T	9163.06	SNP	0,296
NC_007795.1	2613991	.	A	T	226.64	SNP	6,6
NC_007795.1	2613992	.	C	G	226.64	SNP	6,6
NC_007795.1	2613995	.	A	ACG	226.6	INDEL	6,6
NC_007795.1	2613997	.	GAT	G	226.6	INDEL	6,6
NC_007795.1	2678563	.	T	C	4655.06	SNP	0,145
NC_007795.1	2689048	.	G	T	254394	SNP	0,6562
NC_007795.1	2734147	.	G	A	18435.1	SNP	0,564
NC_007795.1	2762204	.	T	C	15897.1	SNP	0,523
NC_007795.1	2782815	.	AC	A	6738.03	INDEL	0,212
NC_007795.1	2814793	.	G	A	11214.1	SNP	0,381

## Sheet: SACIP-Res.table
CHROM	POS	REF	ALT	QUAL	TYPE	SACIP.AD		CHROM	POS	REF	ALT	QUAL	TYPE	SACIP.AD
NC_007795.1	5543	G	A	37066.1	SNP	0,1366		NC_007795.1	1357562	C	T	134778	SNP	0,3752
NC_007795.1	20307	TTAAAGG	T	57796	INDEL	222124		NC_007795.1	1396723	G	A	4772.06	SNP	0,147
NC_007795.1	24190	T	TCCTACCC	676.6	INDEL	10,17		NC_007795.1	1403320	G	A	848.06	SNP	0,30
NC_007795.1	24938	G	A	34573.1	SNP	0,1230		NC_007795.1	1461625	C	T	353.06	SNP	0,10
NC_007795.1	31501	G	A	3883.06	SNP	0,120		NC_007795.1	1478654	G	A	542.06	SNP	0,16
NC_007795.1	43329	C	A	15497.1	SNP	0,535		NC_007795.1	1483883	TG	T	280.6	INDEL	30,9
NC_007795.1	45635	G	A	8141.06	SNP	0,251		NC_007795.1	1483886	T	TA	280.6	INDEL	30,9
NC_007795.1	69311	G	A	1478.06	SNP	0,49		NC_007795.1	1489588	C	A	292.64	SNP	5,22
NC_007795.1	91356	G	A	5509.06	SNP	0,137		NC_007795.1	1491260	TG	T	1482.03	INDEL	0,37
NC_007795.1	91371	G	A	5134.06	SNP	0,121		NC_007795.1	1491475	GC	G	3357.03	INDEL	0,90
NC_007795.1	109988	G	A	1354.06	SNP	0,44		NC_007795.1	1492809	CTT	C	477.6	INDEL	62,16
NC_007795.1	122510	G	A	3365.06	SNP	0,100		NC_007795.1	1492812	C	CCA	477.6	INDEL	62,16
NC_007795.1	132528	G	A	2952.06	SNP	0,97		NC_007795.1	1496937	A	G	61.64	SNP	6,4
NC_007795.1	132770	G	A	5032.06	SNP	0,149		NC_007795.1	1500955	TA	T	33.6	INDEL	8,2
NC_007795.1	168179	G	A	4136.06	SNP	0,133		NC_007795.1	1532073	G	A	55738.1	SNP	0,1754
NC_007795.1	174414	G	A	63073.1	SNP	0,2116		NC_007795.1	1624372	G	A	150605	SNP	0,4200
NC_007795.1	175391	G	A	27159.1	SNP	0,909		NC_007795.1	1645376	G	A	60194.1	SNP	0,1729
NC_007795.1	179583	G	A	72322.1	SNP	0,2253		NC_007795.1	1653482	G	A	8656.06	SNP	0,232
NC_007795.1	222224	G	A	229497	SNP	26781		NC_007795.1	1656539	C	T	28674	SNP	0,1008
NC_007795.1	222782	T	C	6573.06	SNP	0,249		NC_007795.1	1663834	G	A	2247.06	SNP	0,72
NC_007795.1	247635	G	A	42982.1	SNP	0,1327		NC_007795.1	1683491	T	C	64561.1	SNP	0,1867
NC_007795.1	250141	G	A	66433.1	SNP	0,1905		NC_007795.1	1684798	G	A	6461.06	SNP	2226
NC_007795.1	284071	G	A	1417.06	SNP	0,48		NC_007795.1	1688653	G	A	118627	SNP	0,3453
NC_007795.1	289906	T	A	1560.64	SNP	51,41		NC_007795.1	1731931	T	TA	27.6	INDEL	7,2
NC_007795.1	289916	A	G	1996.64	SNP	36,59		NC_007795.1	1733515	G	T	106579	SNP	0,2975
NC_007795.1	291536	T	C	55.64	SNP	7,2		NC_007795.1	1733572	A	G	144162	SNP	74232
NC_007795.1	291544	G	A	58.64	SNP	6,2		NC_007795.1	1779267	G	A	37885.1	SNP	11218
NC_007795.1	292328	G	A	13386.6	SNP	747567		NC_007795.1	1822604	CTAAATAATCG	C	154.6	INDEL	30,6
NC_007795.1	292840	G	T,A	13861.1	SNP	4,48,447		NC_007795.1	1822617	C	G	154.64	SNP	30,6
NC_007795.1	292878	G	A	819.64	SNP	353,45		NC_007795.1	1822779	G	A	1237.06	SNP	0,35
NC_007795.1	292879	C	A	1105.64	SNP	342,51		NC_007795.1	1843581	G	A	173.64	SNP	23,6
NC_007795.1	293057	A	C	1476.64	SNP	331,61		NC_007795.1	1845036	TTCAATG	T	139.6	INDEL	35,6
NC_007795.1	293061	A	AG	1512.6	INDEL	329,62		NC_007795.1	1902385	G	C	63.64	SNP	5,2
NC_007795.1	293525	A	T	3741.64	SNP	220106		NC_007795.1	1902386	CGGGTA	C	63.6	INDEL	5,2
NC_007795.1	293526	A	G	3741.64	SNP	220106		NC_007795.1	1902512	G	T	104.14	SNP	0,4
NC_007795.1	319572	G	A	2225.06	SNP	1,76		NC_007795.1	1902517	A	T	104.14	SNP	0,4
NC_007795.1	344682	G	A	21233.1	SNP	0,709		NC_007795.1	1902761	C	A	21.64	SNP	2,5
NC_007795.1	372836	G	A	63720.1	SNP	21992		NC_007795.1	1905892	G	A	133.97	SNP	0,6
NC_007795.1	383015	G	A	54605.1	SNP	0,1723		NC_007795.1	1930285	T	C	26.64	SNP	3,2
NC_007795.1	393449	T	C	672.06	SNP	0,18		NC_007795.1	1977606	C	T	4152.06	SNP	0,145
NC_007795.1	441117	C	T	3903.64	SNP	1151278		NC_007795.1	1980311	C	T	12647.1	SNP	0,400
NC_007795.1	449412	C	T	136.64	SNP	10,8		NC_007795.1	1981053	A	G	22097.1	SNP	0,621
NC_007795.1	449851	C	T	32.64	SNP	1,2		NC_007795.1	2021643	C	T	14613.1	SNP	0,482
NC_007795.1	451013	A	ACCC	253.6	INDEL	41,11		NC_007795.1	2035907	A	AT	1171.6	INDEL	247105
NC_007795.1	451017	A	C	253.64	SNP	41,11		NC_007795.1	2035914	C	T	9134.01	SNP	0,372
NC_007795.1	451675	G	A	418.64	SNP	90,32		NC_007795.1	2049518	C	T	547.06	SNP	0,17
NC_007795.1	451803	A	G	24.52	SNP	0,4		NC_007795.1	2053220	T	A	125.14	SNP	0,4
NC_007795.1	452127	T	G	240.64	SNP	19,19		NC_007795.1	2055419	G	C	37.64	SNP	8,3
NC_007795.1	482303	T	C	4110.06	SNP	0,123		NC_007795.1	2062173	T	C	40.64	SNP	7,3
NC_007795.1	493340	C	T	83.64	SNP	21,5		NC_007795.1	2066007	C	T	700.06	SNP	0,24
NC_007795.1	496959	T	G	37.32	SNP	0,2		NC_007795.1	2066758	C	T	853.06	SNP	0,26
NC_007795.1	497154	G	A	61.64	SNP	5,12		NC_007795.1	2079950	A	C	34.64	SNP	14,2
NC_007795.1	497182	G	T	52.64	SNP	8,12		NC_007795.1	2085362	C	T	2835.06	SNP	0,85
NC_007795.1	497323	G	T	246.64	SNP	17,19		NC_007795.1	2087725	A	T	53606.1	SNP	0,1592
NC_007795.1	497333	G	T	246.64	SNP	17,19		NC_007795.1	2125108	C	A	26.32	SNP	0,2
NC_007795.1	497435	G	T	110.06	SNP	0,13		NC_007795.1	2125115	A	G	26.32	SNP	0,2
NC_007795.1	506465	AAAGAAATTGAAC	A	64976	INDEL	11628		NC_007795.1	2152152	C	T	102899	SNP	0,3075
NC_007795.1	547624	T	G	84.64	SNP	5,3		NC_007795.1	2166163	G	C	65190.1	SNP	0,1553
NC_007795.1	547648	T	C	81.64	SNP	6,3		NC_007795.1	2166183	C	A	57500.1	SNP	0,1303
NC_007795.1	547670	T	G	81.64	SNP	6,3		NC_007795.1	2221850	C	A	10930.1	SNP	0,337
NC_007795.1	550734	A	G	106.64	SNP	32,5		NC_007795.1	2240399	A	T	119.66	SNP	1,6
NC_007795.1	550736	T	A	106.64	SNP	32,5		NC_007795.1	2241204	C	A	93.81	SNP	1,15
NC_007795.1	590401	CG	C	836.03	INDEL	0,21		NC_007795.1	2241717	G	T	26.64	SNP	3,2
NC_007795.1	621570	C	T	14596.1	SNP	0,515		NC_007795.1	2241722	A	C	26.64	SNP	3,2
NC_007795.1	649126	G	T	1299.06	SNP	0,42		NC_007795.1	2241855	C	A	46.32	SNP	0,2
NC_007795.1	769190	C	T	30771.1	SNP	1898		NC_007795.1	2242113	T	G	75.64	SNP	1,4
NC_007795.1	837006	G	A	55193.1	SNP	0,1803		NC_007795.1	2244115	G	A	23.64	SNP	4,2
NC_007795.1	841103	G	T	64950.1	SNP	0,2231		NC_007795.1	2260129	G	A	16284.1	SNP	0,524
NC_007795.1	841139	G	T	66153.1	SNP	12283		NC_007795.1	2278516	T	A	322.64	SNP	30,10
NC_007795.1	878986	T	A	41553.1	SNP	0,1335		NC_007795.1	2278519	C	A	322.64	SNP	30,10
NC_007795.1	929948	G	A	4172.06	SNP	0,133		NC_007795.1	2296653	TG	T	43056	INDEL	0,1064
NC_007795.1	931547	G	A	14343.1	SNP	0,429		NC_007795.1	2298731	T	TTC	177.6	INDEL	64,9
NC_007795.1	972920	G	A	193412	SNP	45049		NC_007795.1	2298735	A	C	177.64	SNP	64,9
NC_007795.1	1002213	G	A	13141.1	SNP	0,393		NC_007795.1	2351105	C	T	403.06	SNP	0,12
NC_007795.1	1026014	G	A	90048.1	SNP	12556		NC_007795.1	2383630	G	T	34663.1	SNP	0,1121
NC_007795.1	1053759	G	A	4873.05	SNP	0,160		NC_007795.1	2383660	G	T	48108.1	SNP	11445
NC_007795.1	1096664	A	T	231.64	SNP	60,10		NC_007795.1	2446160	TCCC	T	7773.03	INDEL	0,173
NC_007795.1	1096665	T	C	231.64	SNP	60,10		NC_007795.1	2446163	C	CGA	7771.03	INDEL	0,173
NC_007795.1	1104615	G	A	174957	SNP	0,4860		NC_007795.1	2446246	C	T	2005.06	SNP	0,58
NC_007795.1	1110377	G	T	5761.06	SNP	0,205		NC_007795.1	2446630	C	T	52497.1	SNP	0,1798
NC_007795.1	1160513	G	A	3744.06	SNP	0,101		NC_007795.1	2446641	T	A	51483.1	SNP	0,1720
NC_007795.1	1160531	A	G	4995.06	SNP	0,147		NC_007795.1	2458198	G	A	4194.06	SNP	0,140
NC_007795.1	1166424	G	A	42309.1	SNP	0,1348		NC_007795.1	2479839	G	A	27459.1	SNP	0,941
NC_007795.1	1173181	G	A	10130.1	SNP	0,352		NC_007795.1	2498126	CA	C	33.6	INDEL	7,2
NC_007795.1	1180030	G	A	36460.1	SNP	11083		NC_007795.1	2524818	T	A	404.64	SNP	7,19
NC_007795.1	1187108	G	A	33578.1	SNP	0,1121		NC_007795.1	2525469	C	T	6805.06	SNP	0,229
NC_007795.1	1200962	A	T	320.64	SNP	93,27		NC_007795.1	2678563	T	C	4608.06	SNP	0,143
NC_007795.1	1212234	G	A	1376.06	SNP	0,40		NC_007795.1	2689048	G	T	222412	SNP	46062
NC_007795.1	1215915	G	A	32693.1	SNP	41090		NC_007795.1	2731844	C	T	20.64	SNP	5,2
NC_007795.1	1229542	G	A	4063.06	SNP	0,126		NC_007795.1	2734147	G	A	10748.1	SNP	0,306
NC_007795.1	1235001	G	A	112620	SNP	0,3498		NC_007795.1	2762204	T	C	13768.1	SNP	2473
NC_007795.1	1288087	G	A	127129	SNP	83495		NC_007795.1	2782815	AC	A	7385.03	INDEL	3234
NC_007795.1	1313034	G	A	52348.1	SNP	0,1664		NC_007795.1	2814793	G	A	33421.1	SNP	0,1081
NC_007795.1	1340779	C	T	72208.1	SNP	0,2409

## Sheet: SAGaDFO-Cip-Res
CHROM	POS	REF	ALT	QUAL	TYPE	SAGaD1.AD		CHROM	POS	REF	ALT	QUAL	TYPE	SAGaD1.AD
NC_007795.1	5543	G	A	25482.1	SNP	0,971		NC_007795.1	1461625	C	T	213.97	SNP	0,6
NC_007795.1	20307	TTAAAGG	T	67867	INDEL	212195		NC_007795.1	1462249	G	T	313.64	SNP	5,8
NC_007795.1	24938	G	A	42680.1	SNP	0,1502		NC_007795.1	1462250	C	T	313.64	SNP	5,8
NC_007795.1	31501	G	A	9171.06	SNP	0,291		NC_007795.1	1462706	G	GA	57.6	INDEL	4,3
NC_007795.1	43329	C	A	12568.1	SNP	0,430		NC_007795.1	1465324	C	A	20.64	SNP	5,2
NC_007795.1	45635	G	A	5383.06	SNP	0,174		NC_007795.1	1467536	A	T	23.64	SNP	4,2
NC_007795.1	69311	G	A	879.06	SNP	0,27		NC_007795.1	1468962	T	TC	577.6	INDEL	16,16
NC_007795.1	91356	G	A	3505.06	SNP	0,85		NC_007795.1	1468963	A	T	577.64	SNP	16,16
NC_007795.1	91371	G	A	3520.06	SNP	0,84		NC_007795.1	1478654	G	A	273.06	SNP	0,10
NC_007795.1	94927	A	AAACC	310.6	INDEL	20,9		NC_007795.1	1491260	TG	T	2615.03	INDEL	0,65
NC_007795.1	109988	G	A	699.06	SNP	0,24		NC_007795.1	1491475	GC	G	6092.03	INDEL	0,163
NC_007795.1	122510	G	A	3593.06	SNP	0,106		NC_007795.1	1532073	G	A	31886.1	SNP	0,1027
NC_007795.1	132528	G	A	7714.06	SNP	5254		NC_007795.1	1624372	G	A	118288	SNP	0,3488
NC_007795.1	132770	G	A	11719.1	SNP	0,348		NC_007795.1	1645376	G	A	37167.1	SNP	0,1063
NC_007795.1	168179	G	A	41060.1	SNP	0,1253		NC_007795.1	1653482	G	A	27244.1	SNP	0,794
NC_007795.1	174414	G	A	32961.1	SNP	0,1140		NC_007795.1	1656539	C	T	26303	SNP	14930
NC_007795.1	175391	G	A	39446.1	SNP	171296		NC_007795.1	1663834	G	A	2752.06	SNP	0,77
NC_007795.1	179583	G	A	40741.1	SNP	0,1326		NC_007795.1	1683491	T	C	110466	SNP	0,3099
NC_007795.1	222224	G	A	96422.1	SNP	22963		NC_007795.1	1684798	G	A	7128.06	SNP	0,236
NC_007795.1	222782	T	C	4063.06	SNP	0,142		NC_007795.1	1688653	G	A	71617.1	SNP	0,2229
NC_007795.1	247635	G	A	89129.1	SNP	22656		NC_007795.1	1733515	G	T	83222.1	SNP	12369
NC_007795.1	250141	G	A	100586	SNP	32816		NC_007795.1	1733572	A	G	117686	SNP	0,3570
NC_007795.1	284071	G	A	29851.1	SNP	0,1008		NC_007795.1	1779267	G	A	26422.1	SNP	0,889
NC_007795.1	289906	T	A	844.64	SNP	219,36		NC_007795.1	1822779	G	A	4379.06	SNP	0,149
NC_007795.1	289916	A	G	941.64	SNP	201,37		NC_007795.1	1902081	C	T	67.64	SNP	4,4
NC_007795.1	292328	G	A	6484.64	SNP	306277		NC_007795.1	1902517	A	T	39.3	SNP	0,4
NC_007795.1	292840	G	A	6286.06	SNP	4215		NC_007795.1	1902721	G	GA	63.28	INDEL	0,2
NC_007795.1	293525	A	T	1309.64	SNP	208,47		NC_007795.1	1905844	G	T	135.64	SNP	1,6
NC_007795.1	293526	A	G	1309.64	SNP	208,47		NC_007795.1	1905892	G	A	417.06	SNP	0,15
NC_007795.1	319572	G	A	16236.1	SNP	2529		NC_007795.1	1906025	G	T	53.64	SNP	3,10
NC_007795.1	344682	G	A	24090.1	SNP	0,798		NC_007795.1	1906405	T	G	45.64	SNP	3,2
NC_007795.1	372836	G	A	39044.1	SNP	0,1261		NC_007795.1	1906411	T	G	42.64	SNP	4,2
NC_007795.1	383015	G	A	114324	SNP	0,3461		NC_007795.1	1977606	C	T	9845.06	SNP	0,333
NC_007795.1	393449	T	C	363.06	SNP	0,12		NC_007795.1	1980311	C	T	23740.1	SNP	0,748
NC_007795.1	449667	T	G	22.64	SNP	9,2		NC_007795.1	1981053	A	G	27347.1	SNP	0,798
NC_007795.1	450083	G	T	47.64	SNP	5,10		NC_007795.1	2021643	C	T	22646.1	SNP	0,715
NC_007795.1	453001	C	CTGTA	369.6	INDEL	14,10		NC_007795.1	2030927	AAT	A	30913	INDEL	18705
NC_007795.1	453301	G	A	64.64	SNP	5,4		NC_007795.1	2035907	A	AT	5438.6	INDEL	889409
NC_007795.1	482303	T	C	18455.1	SNP	0,548		NC_007795.1	2035914	C	T	38431.1	SNP	0,1417
NC_007795.1	493340	C	T	200.64	SNP	31,12		NC_007795.1	2049518	C	T	766.06	SNP	0,21
NC_007795.1	497293	T	C	71.64	SNP	17,6		NC_007795.1	2053220	T	A	125.14	SNP	0,4
NC_007795.1	506465	AAAGAAATTGAAC	A	63910	INDEL	11587		NC_007795.1	2054249	G	A	20.64	SNP	5,2
NC_007795.1	590401	CG	C	1646.03	INDEL	0,41		NC_007795.1	2066007	C	T	1345.06	SNP	0,42
NC_007795.1	621570	C	T	14177.1	SNP	0,507		NC_007795.1	2066758	C	T	1879.06	SNP	0,62
NC_007795.1	642504	A	AGCGGGT	12807	INDEL	22308		NC_007795.1	2073345	TAACTAAA	T	128.6	INDEL	25,5
NC_007795.1	649126	G	T	2777.06	SNP	0,89		NC_007795.1	2085362	C	T	1063.06	SNP	0,33
NC_007795.1	748221	G	C	414.64	SNP	41,13		NC_007795.1	2087725	A	T	52017.1	SNP	0,1540
NC_007795.1	748225	AATTGTTT	A	390.6	INDEL	49,13		NC_007795.1	2122826	A	G	52.64	SNP	8,2
NC_007795.1	769190	C	T	23585.1	SNP	0,692		NC_007795.1	2122827	A	T	52.64	SNP	8,2
NC_007795.1	837006	G	A	78180.1	SNP	0,2217		NC_007795.1	2123964	C	G	85.14	SNP	0,4
NC_007795.1	841103	G	T	37718.1	SNP	11316		NC_007795.1	2124586	G	C	26.32	SNP	0,2
NC_007795.1	841139	G	T	36090.1	SNP	31363		NC_007795.1	2125086	T	A	166.14	SNP	0,4
NC_007795.1	878986	T	A	29975.1	SNP	0,964		NC_007795.1	2125087	TC	T	166.1	INDEL	0,4
NC_007795.1	886635	A	G	32.64	SNP	1,2		NC_007795.1	2125626	T	G	66.32	SNP	0,2
NC_007795.1	887161	T	TA	56.6	INDEL	5,3		NC_007795.1	2152152	C	T	56199.1	SNP	11755
NC_007795.1	929948	G	A	5719.06	SNP	0,168		NC_007795.1	2166163	G	C	44286.1	SNP	0,1397
NC_007795.1	931547	G	A	19941.1	SNP	0,596		NC_007795.1	2166183	C	A	39329.1	SNP	0,1165
NC_007795.1	945916	TA	T	45.6	INDEL	1,2		NC_007795.1	2221850	C	A	4365.06	SNP	0,138
NC_007795.1	972920	G	A	238312	SNP	15799		NC_007795.1	2239956	T	C	166.14	SNP	0,4
NC_007795.1	1002213	G	A	18424.1	SNP	0,540		NC_007795.1	2239958	G	T	166.14	SNP	0,4
NC_007795.1	1026014	G	A	37469.1	SNP	0,1112		NC_007795.1	2242113	T	G	102.64	SNP	16,6
NC_007795.1	1053759	G	A	27199.1	SNP	0,857		NC_007795.1	2260129	G	A	57412.1	SNP	0,1791
NC_007795.1	1104615	G	A	162548	SNP	24545		NC_007795.1	2296653	TG	T	24546	INDEL	0,607
NC_007795.1	1110377	G	T	5177.06	SNP	0,184		NC_007795.1	2351105	C	T	224.04	SNP	0,8
NC_007795.1	1141109	G	A	2950.64	SNP	14110		NC_007795.1	2380054	T	A	114.64	SNP	8,21
NC_007795.1	1160513	G	A	4981.06	SNP	0,128		NC_007795.1	2383630	G	T	28965.1	SNP	0,922
NC_007795.1	1160531	A	G	7627.06	SNP	0,233		NC_007795.1	2383660	G	T	40823.1	SNP	0,1218
NC_007795.1	1166424	G	A	42603.1	SNP	0,1361		NC_007795.1	2446160	TCCC	T	2732.03	INDEL	0,61
NC_007795.1	1173181	G	A	13234	SNP	0,488		NC_007795.1	2446163	C	CGA	2731.03	INDEL	0,61
NC_007795.1	1180030	G	A	70118.1	SNP	0,2050		NC_007795.1	2446246	C	T	97.64	SNP	20,7
NC_007795.1	1187108	G	A	39971.1	SNP	21312		NC_007795.1	2446630	C	T	29334.1	SNP	0,1015
NC_007795.1	1212234	G	A	11989.1	SNP	0,336		NC_007795.1	2446641	T	A	30103.1	SNP	0,1025
NC_007795.1	1215915	G	A	19876.1	SNP	0,656		NC_007795.1	2458198	G	A	5044.06	SNP	0,159
NC_007795.1	1229542	G	A	18167.1	SNP	7588		NC_007795.1	2479839	G	A	13459.1	SNP	0,481
NC_007795.1	1235001	G	A	143127	SNP	0,4264		NC_007795.1	2525469	C	T	5192.06	SNP	0,181
NC_007795.1	1288087	G	A	62284.1	SNP	0,1827		NC_007795.1	2640682	G	T	175.64	SNP	26,12
NC_007795.1	1313034	G	A	2930.06	SNP	0,98		NC_007795.1	2678563	T	C	5621.06	SNP	1171
NC_007795.1	1340779	C	T	6360.06	SNP	2233		NC_007795.1	2689048	G	T	18275.1	SNP	0,617
NC_007795.1	1357562	C	T	154657	SNP	0,4277		NC_007795.1	2734147	G	A	4036.06	SNP	0,114
NC_007795.1	1396723	G	A	6272.06	SNP	0,196		NC_007795.1	2762204	T	C	97498.1	SNP	22920
NC_007795.1	1403320	G	A	1397.06	SNP	0,48		NC_007795.1	2782815	AC	A	176.93	INDEL	0,6
NC_007795.1	1461625	C	T	213.97	SNP	0,6		NC_007795.1	2814793	G	A	70586.1	SNP	0,2145

## Sheet: SAGaLDFC-Cip-Res
CHROM	POS	ID	REF	ALT	QUAL	TYPE	SAGaD5.AD
NC_007795.1	16717	.	T	C	1093.06	SNP	0,31
NC_007795.1	20307	.	TTAAAGG	T	28923	INDEL	121048
NC_007795.1	45993	.	G	A	868.06	SNP	0,26
NC_007795.1	69439	.	G	A	432.06	SNP	0,14
NC_007795.1	91623	.	GA	G	7115.03	INDEL	1230
NC_007795.1	95479	.	T	C	42.64	SNP	11,2
NC_007795.1	100938	.	A	AAC	71098	INDEL	42172
NC_007795.1	118094	.	A	T	1843.06	SNP	0,48
NC_007795.1	123862	.	G	T	6512.06	SNP	0,187
NC_007795.1	135636	.	T	C	9939.06	SNP	0,308
NC_007795.1	160833	.	A	G	740.06	SNP	0,24
NC_007795.1	164483	.	A	G	18834.1	SNP	0,531
NC_007795.1	210329	.	T	C	398.06	SNP	0,11
NC_007795.1	249237	.	CCAGAAGAATTAAAGAGTG	C	2077.6	INDEL	775104
NC_007795.1	256430	.	G	A	922.06	SNP	0,32
NC_007795.1	266558	.	T	C	2240.06	SNP	0,72
NC_007795.1	275244	.	C	T	28876.1	SNP	0,887
NC_007795.1	289906	.	T	A	1149.64	SNP	76,33
NC_007795.1	289916	.	A	G	1212.64	SNP	69,34
NC_007795.1	290513	.	T	C	222.64	SNP	50,10
NC_007795.1	290519	.	G	A	222.64	SNP	50,10
NC_007795.1	292328	.	G	A	614.64	SNP	42,25
NC_007795.1	292714	.	T	C	105.64	SNP	32,5
NC_007795.1	292720	.	C	A	97.64	SNP	35,5
NC_007795.1	292759	.	C	T	122.64	SNP	48,8
NC_007795.1	292838	.	G	A	115.64	SNP	43,6
NC_007795.1	292840	.	G	A,T	1319.1	SNP	0,38,6
NC_007795.1	293838	.	AAG	A	115.6	INDEL	43,6
NC_007795.1	293845	.	A	ACG	106.6	INDEL	46,6
NC_007795.1	293847	.	T	A	106.64	SNP	46,6
NC_007795.1	319632	.	A	G	4273.06	SNP	0,126
NC_007795.1	321330	.	T	C	20.64	SNP	5,2
NC_007795.1	336837	.	G	A	37.32	SNP	0,2
NC_007795.1	345791	.	G	A	1186.06	SNP	0,37
NC_007795.1	378334	.	G	A	39.64	SNP	12,2
NC_007795.1	378778	.	TG	T	31.6	INDEL	10,2
NC_007795.1	391921	.	TC	T	49.6	INDEL	6,2
NC_007795.1	397545	.	T	C	179.02	SNP	0,7
NC_007795.1	406125	.	G	T	1590.64	SNP	117,80
NC_007795.1	411758	.	C	A	6986.06	SNP	1156
NC_007795.1	411759	.	A	C	6986.06	SNP	1156
NC_007795.1	418976	.	C	T	4142.06	SNP	0,128
NC_007795.1	421411	.	T	C	358.06	SNP	0,11
NC_007795.1	432536	.	G	GT	26.6	INDEL	7,2
NC_007795.1	435208	.	CAAT	C	70.6	INDEL	2,2
NC_007795.1	438526	.	T	C	709.06	SNP	0,26
NC_007795.1	450096	.	C	T	52.64	SNP	8,2
NC_007795.1	450097	.	G	C	52.64	SNP	8,2
NC_007795.1	451498	.	A	T	73.64	SNP	1,2
NC_007795.1	451506	.	A	C	73.64	SNP	1,2
NC_007795.1	469909	.	T	A	28381.1	SNP	0,1000
NC_007795.1	499784	.	G	C	368.64	SNP	12,14
NC_007795.1	499786	.	G	GATTGTA	368.6	INDEL	12,14
NC_007795.1	512182	.	G	A	18645	SNP	0,661
NC_007795.1	517190	.	C	T	6730.06	SNP	10208
NC_007795.1	523722	.	A	G	58982.1	SNP	31754
NC_007795.1	549823	.	C	A	22799.6	SNP	1489663
NC_007795.1	549841	.	T	C	20321.6	SNP	1620772
NC_007795.1	554107	.	C	T	8628.64	SNP	1346394
NC_007795.1	554146	.	T	C	19438.6	SNP	1202708
NC_007795.1	554232	.	CTTT	C	14584.6	INDEL	1172439
NC_007795.1	554238	.	T	TGCA	16927.6	INDEL	1166490
NC_007795.1	554364	.	T	G	19890.6	SNP	2670893
NC_007795.1	559690	.	C	A	18207.1	SNP	1563
NC_007795.1	560998	.	G	A	3472.06	SNP	0,110
NC_007795.1	563204	.	C	T	1668.06	SNP	0,50
NC_007795.1	568935	.	G	A	1652.06	SNP	0,50
NC_007795.1	587134	.	T	G	8162.06	SNP	0,209
NC_007795.1	590401	.	CG	C	1524.03	INDEL	0,38
NC_007795.1	624930	.	TTGTCTTTAC	T	20280	INDEL	2586
NC_007795.1	632102	.	G	A	10920.1	SNP	0,315
NC_007795.1	649126	.	G	T	1974.06	SNP	0,65
NC_007795.1	694686	.	A	G	11239.1	SNP	0,355
NC_007795.1	711641	.	C	T	105349	SNP	102996
NC_007795.1	719581	.	A	G	358.06	SNP	0,11
NC_007795.1	754319	.	T	C	346.64	SNP	21,10
NC_007795.1	754320	.	AC	A	346.6	INDEL	21,10
NC_007795.1	755648	.	C	T	3658.06	SNP	0,106
NC_007795.1	764915	.	G	T	15194.1	SNP	1464
NC_007795.1	779718	.	A	G	65395.1	SNP	11890
NC_007795.1	791685	.	T	G	448.64	SNP	12,14
NC_007795.1	791686	.	C	A	448.64	SNP	12,14
NC_007795.1	793665	.	T	C	32907.1	SNP	0,978
NC_007795.1	794956	.	G	A	27948.1	SNP	1944
NC_007795.1	795397	.	T	TAGCGATTCAGAATCAGAC	17427	INDEL	6414
NC_007795.1	832147	.	C	T	27525.1	SNP	0,794
NC_007795.1	841103	.	G	T	25152.1	SNP	4834
NC_007795.1	841139	.	G	T	27366.1	SNP	0,879
NC_007795.1	862755	.	C	T	1140.06	SNP	0,40
NC_007795.1	882793	.	T	C	7201.06	SNP	0,247
NC_007795.1	894524	.	G	A	2861.06	SNP	0,77
NC_007795.1	896207	.	G	A	4294.06	SNP	0,129
NC_007795.1	903870	.	C	G	569.06	SNP	0,18
NC_007795.1	911952	.	G	A	21586.1	SNP	0,592
NC_007795.1	920601	.	A	G	56920.1	SNP	0,1700
NC_007795.1	929065	.	G	A	11401.1	SNP	0,316
NC_007795.1	941592	.	C	G	12851.1	SNP	0,396
NC_007795.1	961318	.	A	C	10475.1	SNP	0,293
NC_007795.1	967176	.	A	G	88925.1	SNP	0,2536
NC_007795.1	975477	.	C	G	22005.6	SNP	4104949
NC_007795.1	980899	.	T	A	979.06	SNP	0,28
NC_007795.1	993559	.	C	G	1597.06	SNP	0,49
NC_007795.1	997862	.	C	T	27096.1	SNP	0,838
NC_007795.1	1004395	.	G	A	46558.1	SNP	0,1433
NC_007795.1	1010745	.	C	T	116054	SNP	23353
NC_007795.1	1019905	.	C	T	5772.06	SNP	0,196
NC_007795.1	1023076	.	C	A	72218.1	SNP	22405
NC_007795.1	1034508	.	C	A	43216.1	SNP	0,1220
NC_007795.1	1049031	.	G	GC	1182.03	INDEL	0,32
NC_007795.1	1054663	.	G	A	19981.1	SNP	0,563
NC_007795.1	1057032	.	GA	G	25152	INDEL	0,583
NC_007795.1	1057036	.	A	G	25027.1	SNP	2583
NC_007795.1	1072633	.	G	A	9418.06	SNP	0,311
NC_007795.1	1075373	.	C	T	23184.1	SNP	0,602
NC_007795.1	1090525	.	AAAGCTTTC	A	5086.03	INDEL	2153
NC_007795.1	1126511	.	A	G	10550.1	SNP	0,373
NC_007795.1	1150700	.	G	A	38611.1	SNP	0,1160
NC_007795.1	1156829	.	G	A	17069.1	SNP	0,499
NC_007795.1	1160513	.	G	A	1768.06	SNP	0,45
NC_007795.1	1160531	.	A	G	2105.06	SNP	0,60
NC_007795.1	1181692	.	T	A	50962.1	SNP	0,1594
NC_007795.1	1239923	.	A	G	4096.06	SNP	0,125
NC_007795.1	1243203	.	A	G	81995.1	SNP	42168
NC_007795.1	1253121	.	T	C	2437.06	SNP	0,84
NC_007795.1	1308643	.	A	G	1925.06	SNP	0,63
NC_007795.1	1311131	.	A	G	20.64	SNP	5,2
NC_007795.1	1312331	.	C	T	355.64	SNP	19,10
NC_007795.1	1312334	.	T	A	355.64	SNP	19,10
NC_007795.1	1312536	.	ATT	A	43.6	INDEL	11,2
NC_007795.1	1312539	.	C	CCT	43.6	INDEL	11,2
NC_007795.1	1312544	.	C	G	43.64	SNP	11,2
NC_007795.1	1312545	.	G	A	43.64	SNP	11,2
NC_007795.1	1313441	.	TA	T	45.6	INDEL	4,2
NC_007795.1	1328392	.	G	C	146.64	SNP	18,5
NC_007795.1	1330445	.	G	A	26.64	SNP	3,2
NC_007795.1	1358048	.	A	G	133375	SNP	13425
NC_007795.1	1383947	.	C	G	29.64	SNP	2,2
NC_007795.1	1385061	.	AC	A	58.6	INDEL	6,2
NC_007795.1	1385064	.	T	A	58.64	SNP	6,2
NC_007795.1	1386335	.	C	T	23.64	SNP	4,2
NC_007795.1	1388177	.	CTG	C	33.6	INDEL	14,2
NC_007795.1	1389009	.	T	A	760.06	SNP	0,24
NC_007795.1	1389646	.	G	A	358.06	SNP	0,11
NC_007795.1	1390038	.	TTG	T	63.6	INDEL	4,2
NC_007795.1	1399759	.	C	T	978.06	SNP	0,32
NC_007795.1	1433531	.	C	T	10963.1	SNP	0,363
NC_007795.1	1440034	.	C	A	5240.06	SNP	0,157
NC_007795.1	1494302	.	C	T	2670.06	SNP	0,87
NC_007795.1	1494392	.	T	C	1491.06	SNP	0,56
NC_007795.1	1494458	.	A	G	820.06	SNP	0,24
NC_007795.1	1494629	.	G	A	269.05	SNP	0,9
NC_007795.1	1494653	.	G	T	269.05	SNP	0,9
NC_007795.1	1494698	.	A	G	78.32	SNP	0,2
NC_007795.1	1494710	.	T	C	77.32	SNP	0,2
NC_007795.1	1496570	.	C	T	996.06	SNP	0,36
NC_007795.1	1525650	.	A	G	22771.1	SNP	0,692
NC_007795.1	1528923	.	C	T	1939.06	SNP	0,49
NC_007795.1	1531941	.	A	C	15083.1	SNP	0,434
NC_007795.1	1540632	.	A	T	32615.1	SNP	0,943
NC_007795.1	1581658	.	T	C	37152.1	SNP	0,1031
NC_007795.1	1589997	.	A	AT	478.6	INDEL	165,35
NC_007795.1	1596759	.	C	G	1603.06	SNP	0,50
NC_007795.1	1601678	.	CT	C	42.6	INDEL	4,2
NC_007795.1	1605397	.	G	T	23892.1	SNP	0,650
NC_007795.1	1616911	.	CA	C	535.6	INDEL	29,15
NC_007795.1	1634485	.	A	G	6607.06	SNP	1225
NC_007795.1	1653482	.	G	A	22941.1	SNP	0,605
NC_007795.1	1683491	.	T	C	72046.1	SNP	0,1977
NC_007795.1	1692553	.	C	T	16996.1	SNP	0,492
NC_007795.1	1726519	.	C	T	53014.1	SNP	0,1483
NC_007795.1	1730974	.	A	G	2863.06	SNP	0,84
NC_007795.1	1733515	.	G	T	73933.1	SNP	12087
NC_007795.1	1733572	.	A	G	94323.1	SNP	12848
NC_007795.1	1734087	.	C	T	11424.1	SNP	0,302
NC_007795.1	1738591	.	G	A	1816.06	SNP	0,57
NC_007795.1	1742688	.	G	C	28189.1	SNP	0,875
NC_007795.1	1746904	.	CG	C	5078.03	INDEL	0,136
NC_007795.1	1784089	.	T	G	298.02	SNP	0,7
NC_007795.1	1786014	.	G	A	655.06	SNP	0,23
NC_007795.1	1804684	.	A	T	29.64	SNP	2,2
NC_007795.1	1845707	.	T	C	88846.1	SNP	0,2390
NC_007795.1	1846928	.	T	A	80102.1	SNP	0,2449
NC_007795.1	1864377	.	T	C	29.64	SNP	2,2
NC_007795.1	1867853	.	T	C	21235.1	SNP	0,670
NC_007795.1	1871062	.	C	T	12180.1	SNP	0,405
NC_007795.1	1894675	.	G	GA	34.6	INDEL	14,3
NC_007795.1	1902721	.	G	A	23.64	SNP	4,2
NC_007795.1	1904424	.	A	T	95.64	SNP	9,6
NC_007795.1	1915504	.	TCC	T	73.6	INDEL	1,2
NC_007795.1	1924112	.	C	T	9302.06	SNP	0,267
NC_007795.1	1926617	.	G	A	1901.06	SNP	0,58
NC_007795.1	1926701	.	C	A	1616.06	SNP	0,57
NC_007795.1	1926721	.	T	C	1381.06	SNP	0,50
NC_007795.1	1926773	.	G	A	1568.06	SNP	0,44
NC_007795.1	1926785	.	A	G	1483.06	SNP	0,42
NC_007795.1	1926809	.	T	A	1469.06	SNP	0,40
NC_007795.1	1926880	.	C	T	1437.06	SNP	0,45
NC_007795.1	1926917	.	A	G	1053.06	SNP	0,40
NC_007795.1	1926931	.	A	G	830.06	SNP	0,34
NC_007795.1	1927205	.	T	C	523.06	SNP	0,12
NC_007795.1	1927285	.	G	A	1697.06	SNP	0,52
NC_007795.1	1927329	.	T	A	2707.06	SNP	0,86
NC_007795.1	1927588	.	A	G	2531.06	SNP	0,76
NC_007795.1	1927771	.	A	G	1499.06	SNP	0,44
NC_007795.1	1927801	.	T	C	1300.06	SNP	0,41
NC_007795.1	1927846	.	G	A	1223.06	SNP	0,32
NC_007795.1	1927969	.	T	C	1925.06	SNP	0,58
NC_007795.1	1928208	.	A	G	661.06	SNP	0,15
NC_007795.1	1928376	.	A	T	2560.06	SNP	0,82
NC_007795.1	1928947	.	C	T	2596.06	SNP	0,95
NC_007795.1	1928994	.	G	A	1739.06	SNP	0,49
NC_007795.1	1929031	.	A	G	2140.06	SNP	0,62
NC_007795.1	1929076	.	T	A	1607.06	SNP	0,54
NC_007795.1	1929137	.	G	A	1415.06	SNP	0,32
NC_007795.1	1929138	.	C	T	1415.06	SNP	0,32
NC_007795.1	1929511	.	T	C	173.97	SNP	0,6
NC_007795.1	1929616	.	C	T	1044.06	SNP	0,29
NC_007795.1	1929847	.	G	A	1696.06	SNP	0,38
NC_007795.1	1929853	.	T	C	1721.06	SNP	0,39
NC_007795.1	1930201	.	C	T	954.06	SNP	0,27
NC_007795.1	1931039	.	G	A	2328.06	SNP	0,72
NC_007795.1	1931290	.	T	A	1170.06	SNP	0,37
NC_007795.1	1932157	.	C	T	1976.06	SNP	0,60
NC_007795.1	1932258	.	A	C	2284.06	SNP	1,68
NC_007795.1	1932421	.	A	G	3111.06	SNP	0,104
NC_007795.1	1932724	.	T	C	2219.06	SNP	0,71
NC_007795.1	1932751	.	G	C	1966.06	SNP	0,56
NC_007795.1	1932834	.	C	T	2641.06	SNP	0,59
NC_007795.1	1932835	.	C	T	2641.06	SNP	0,59
NC_007795.1	1932877	.	A	G	2861.06	SNP	0,85
NC_007795.1	1932900	.	C	T	3748.06	SNP	0,121
NC_007795.1	1932921	.	T	C	3256.06	SNP	3106
NC_007795.1	1933020	.	A	G	3525.06	SNP	0,80
NC_007795.1	1933026	.	T	C	3525.06	SNP	0,80
NC_007795.1	1933098	.	G	T	3026.06	SNP	5,99
NC_007795.1	1933165	.	C	T	2086.06	SNP	0,58
NC_007795.1	1933203	.	G	A	2396.06	SNP	1,69
NC_007795.1	1933338	.	C	A	4059.06	SNP	0,99
NC_007795.1	1933347	.	C	A	3783.06	SNP	0,88
NC_007795.1	1933386	.	T	C	3183.06	SNP	0,92
NC_007795.1	1934455	.	A	G	2352.06	SNP	0,72
NC_007795.1	1934620	.	T	C	566.06	SNP	0,16
NC_007795.1	1935464	.	C	T	1294.06	SNP	0,44
NC_007795.1	1936646	.	G	A	1177.06	SNP	1,38
NC_007795.1	1936664	.	T	C	1207.06	SNP	0,33
NC_007795.1	1936777	.	T	A	4171.06	SNP	0,93
NC_007795.1	1936780	.	C	T	4171.06	SNP	0,93
NC_007795.1	1937179	.	A	G	1163.06	SNP	0,33
NC_007795.1	1937231	.	C	T	1171.06	SNP	0,34
NC_007795.1	1937320	.	G	A	2468.06	SNP	0,72
NC_007795.1	1937407	.	G	T	4152.06	SNP	8101
NC_007795.1	1937997	.	A	G	2636.06	SNP	0,77
NC_007795.1	1938009	.	T	C	2304.06	SNP	0,67
NC_007795.1	1938177	.	CA	C	346	INDEL	0,8
NC_007795.1	1938181	.	C	CT	346	INDEL	0,8
NC_007795.1	1938258	.	C	T	2532.06	SNP	0,90
NC_007795.1	1938322	.	G	C	2506.06	SNP	0,56
NC_007795.1	1938325	.	A	G	2506.06	SNP	0,56
NC_007795.1	1938367	.	A	T	2203.06	SNP	0,66
NC_007795.1	1938495	.	C	T	2118.06	SNP	0,53
NC_007795.1	1938586	.	T	C	3616.06	SNP	0,116
NC_007795.1	1938613	.	C	T	4258.06	SNP	0,145
NC_007795.1	1938754	.	A	G	1945.06	SNP	0,59
NC_007795.1	1938781	.	T	C	1484.06	SNP	0,46
NC_007795.1	1938813	.	G	A	1558.06	SNP	0,39
NC_007795.1	1938830	.	A	G	1544.06	SNP	0,36
NC_007795.1	1939252	.	T	C	1395.06	SNP	0,44
NC_007795.1	1939414	.	A	T	3591.06	SNP	0,114
NC_007795.1	1939453	.	T	C	4135.06	SNP	0,136
NC_007795.1	1939618	.	T	A	6334.06	SNP	0,142
NC_007795.1	1939681	.	G	A	3830.06	SNP	0,116
NC_007795.1	1939906	.	C	A	695.06	SNP	0,23
NC_007795.1	1940014	.	C	A	214.97	SNP	0,6
NC_007795.1	1940035	.	A	T	349.05	SNP	0,9
NC_007795.1	1940056	.	A	G	354.06	SNP	0,10
NC_007795.1	1940074	.	G	T	403.06	SNP	0,12
NC_007795.1	1940131	.	C	A	870.06	SNP	0,26
NC_007795.1	1940176	.	A	G	2503.06	SNP	0,56
NC_007795.1	1940180	.	T	C	2503.06	SNP	0,56
NC_007795.1	1940272	.	A	G	2178.06	SNP	0,69
NC_007795.1	1940359	.	T	A	2843.06	SNP	0,65
NC_007795.1	1940362	.	A	T	2843.06	SNP	0,65
NC_007795.1	1940440	.	A	G	3099.06	SNP	0,71
NC_007795.1	1940449	.	A	G	3173.06	SNP	0,74
NC_007795.1	1940590	.	A	T	5138.06	SNP	0,132
NC_007795.1	1940713	.	G	A	2636.06	SNP	0,95
NC_007795.1	1940971	.	A	G	2325.06	SNP	0,79
NC_007795.1	1941001	.	T	C	2426.06	SNP	0,90
NC_007795.1	1941019	.	A	T	2457.06	SNP	0,85
NC_007795.1	1941254	.	A	G	4855.06	SNP	0,155
NC_007795.1	1942058	.	T	C	9936.06	SNP	0,225
NC_007795.1	1942079	.	G	A	11014.1	SNP	0,264
NC_007795.1	1942304	.	T	C	4931.06	SNP	0,133
NC_007795.1	1942609	.	C	T	2219.06	SNP	0,66
NC_007795.1	1942721	.	A	G	3503.06	SNP	0,81
NC_007795.1	1942727	.	T	C	3523.06	SNP	0,81
NC_007795.1	1943077	.	T	C	5410.06	SNP	0,121
NC_007795.1	1943101	.	G	A	5449.06	SNP	0,125
NC_007795.1	1943451	.	A	G	7250.06	SNP	0,221
NC_007795.1	1943475	.	A	G	6946.06	SNP	0,209
NC_007795.1	1943549	.	T	C	8405.06	SNP	0,240
NC_007795.1	1943585	.	C	T	8652.06	SNP	0,247
NC_007795.1	1943882	.	G	A	5169.06	SNP	0,119
NC_007795.1	1943888	.	T	C	5194.06	SNP	0,120
NC_007795.1	1944099	.	T	C	3979.06	SNP	0,130
NC_007795.1	1944153	.	T	C	9120.06	SNP	0,206
NC_007795.1	1944163	.	A	G	9316.06	SNP	0,213
NC_007795.1	1944346	.	A	G	5121.06	SNP	0,150
NC_007795.1	1944448	.	A	G	9597.06	SNP	6305
NC_007795.1	1944538	.	G	A	10789.1	SNP	0,372
NC_007795.1	1944550	.	G	A	9941.06	SNP	0,339
NC_007795.1	1944580	.	A	G	6990.06	SNP	0,214
NC_007795.1	1944664	.	T	C	3382.06	SNP	0,90
NC_007795.1	1944694	.	C	T	3360.06	SNP	0,97
NC_007795.1	1944769	.	T	C	6093.06	SNP	0,191
NC_007795.1	1944787	.	C	T	6297.06	SNP	0,203
NC_007795.1	1944874	.	T	C	6454.06	SNP	0,197
NC_007795.1	1944910	.	T	A	5598.06	SNP	0,177
NC_007795.1	1945084	.	A	T	3084.06	SNP	0,88
NC_007795.1	1945469	.	G	A	7484.06	SNP	0,255
NC_007795.1	1945653	.	G	T	6957.06	SNP	0,158
NC_007795.1	1945665	.	T	C	6981.06	SNP	0,159
NC_007795.1	1946120	.	T	C	3079.06	SNP	0,104
NC_007795.1	1946156	.	A	G	2677.06	SNP	0,85
NC_007795.1	1946286	.	C	T	77.32	SNP	0,2
NC_007795.1	1946495	.	G	A	1103.06	SNP	0,33
NC_007795.1	1946618	.	A	T	3208.06	SNP	0,106
NC_007795.1	1946639	.	T	C	2914.06	SNP	0,103
NC_007795.1	1946675	.	T	C	2866.06	SNP	0,64
NC_007795.1	1946681	.	G	A	2915.06	SNP	0,66
NC_007795.1	1946918	.	T	C	4575.06	SNP	0,105
NC_007795.1	1946921	.	C	A	4575.06	SNP	0,105
NC_007795.1	1946963	.	C	G	2391.06	SNP	0,89
NC_007795.1	1947074	.	G	A	448.06	SNP	0,13
NC_007795.1	1947092	.	C	T	398.06	SNP	0,11
NC_007795.1	1947419	.	G	A	2483.06	SNP	0,58
NC_007795.1	1947535	.	A	G	1267.06	SNP	0,37
NC_007795.1	1947590	.	A	G	1769.06	SNP	0,64
NC_007795.1	1947623	.	C	T	3124.06	SNP	0,72
NC_007795.1	1947629	.	A	G	2980.06	SNP	0,67
NC_007795.1	1947668	.	G	A	1880.06	SNP	0,62
NC_007795.1	1947725	.	T	C	1772.06	SNP	0,56
NC_007795.1	1948136	.	T	A	1890.06	SNP	0,43
NC_007795.1	1948142	.	G	A	1890.06	SNP	0,43
NC_007795.1	1948211	.	G	T	1438.06	SNP	0,43
NC_007795.1	1948592	.	C	T	1299.06	SNP	0,45
NC_007795.1	1948706	.	A	G	121.84	SNP	0,3
NC_007795.1	1950922	.	C	T	1251.06	SNP	0,39
NC_007795.1	1950934	.	C	T	1489.06	SNP	0,47
NC_007795.1	1951131	.	G	A	389.05	SNP	0,9
NC_007795.1	1951253	.	T	C	121.84	SNP	0,3
NC_007795.1	1951272	.	C	T	121.84	SNP	0,3
NC_007795.1	1951374	.	A	C	525.06	SNP	0,21
NC_007795.1	1952112	.	T	G	227.05	SNP	0,9
NC_007795.1	1952132	.	T	C	85.14	SNP	0,4
NC_007795.1	1952417	.	T	C	78.32	SNP	0,2
NC_007795.1	1952438	.	G	A	372.06	SNP	0,14
NC_007795.1	1952788	.	A	T	121.84	SNP	0,3
NC_007795.1	1952789	.	AT	A	121.8	INDEL	0,3
NC_007795.1	1953229	.	C	T	229.05	SNP	0,9
NC_007795.1	1953262	.	C	T	229.05	SNP	0,9
NC_007795.1	1953433	.	C	CT	1156.03	INDEL	0,26
NC_007795.1	1953438	.	TA	T	1156.03	INDEL	0,26
NC_007795.1	1953441	.	G	T	1324.06	SNP	0,32
NC_007795.1	1953445	.	T	C	1324.06	SNP	0,32
NC_007795.1	1953481	.	C	T	1100.06	SNP	0,40
NC_007795.1	1953622	.	G	A	759.06	SNP	0,28
NC_007795.1	1954493	.	G	A	78.32	SNP	0,2
NC_007795.1	1954544	.	A	G	78.32	SNP	0,2
NC_007795.1	1954635	.	G	A	1091.06	SNP	0,30
NC_007795.1	1959486	.	C	A	561.06	SNP	0,15
NC_007795.1	1959528	.	C	T	1410.06	SNP	0,33
NC_007795.1	1959531	.	T	A	1410.06	SNP	0,33
NC_007795.1	1959594	.	T	C	1354.06	SNP	0,43
NC_007795.1	1959636	.	G	A	1331.06	SNP	0,39
NC_007795.1	1959745	.	T	A	1178.06	SNP	0,32
NC_007795.1	1959849	.	A	C	874.06	SNP	0,27
NC_007795.1	1960024	.	T	C	37.32	SNP	0,2
NC_007795.1	1960779	.	T	C	1201.06	SNP	0,27
NC_007795.1	1960790	.	C	A	1201.06	SNP	0,27
NC_007795.1	1961176	.	C	T	646.06	SNP	0,21
NC_007795.1	1961393	.	T	C	2416.06	SNP	0,54
NC_007795.1	1961395	.	T	G	2416.06	SNP	0,54
NC_007795.1	1962211	.	T	G	1336.06	SNP	0,40
NC_007795.1	1968023	.	G	A	10346.1	SNP	0,329
NC_007795.1	1981053	.	A	G	12216.1	SNP	0,329
NC_007795.1	1983390	.	T	C	1227.06	SNP	0,34
NC_007795.1	1985272	.	G	T	12376.1	SNP	2383
NC_007795.1	1993240	.	A	G	29463.1	SNP	0,902
NC_007795.1	2002934	.	C	T	32344.1	SNP	0,887
NC_007795.1	2016149	.	T	C	9192.06	SNP	0,281
NC_007795.1	2023001	.	T	G	47613.1	SNP	0,1425
NC_007795.1	2025858	.	G	A	23231.1	SNP	0,670
NC_007795.1	2059550	.	C	T	476.06	SNP	0,19
NC_007795.1	2060711	.	C	T	426.06	SNP	0,17
NC_007795.1	2060723	.	T	C	471.06	SNP	0,18
NC_007795.1	2062692	.	A	C	976.06	SNP	0,22
NC_007795.1	2062700	.	G	T	976.06	SNP	0,22
NC_007795.1	2062758	.	G	A	829.06	SNP	0,26
NC_007795.1	2062861	.	T	A	358.06	SNP	0,11
NC_007795.1	2063082	.	C	T	1286.06	SNP	0,38
NC_007795.1	2063095	.	G	A	1183.06	SNP	0,33
NC_007795.1	2063574	.	G	A	551.06	SNP	0,18
NC_007795.1	2063649	.	T	C	1434.06	SNP	0,47
NC_007795.1	2063670	.	T	A	1309.06	SNP	0,45
NC_007795.1	2064053	.	C	T	1004.06	SNP	0,29
NC_007795.1	2064065	.	G	A	1637.06	SNP	0,51
NC_007795.1	2065337	.	A	G	1003.06	SNP	0,31
NC_007795.1	2065348	.	C	T	913.06	SNP	0,30
NC_007795.1	2065378	.	G	C	1025.06	SNP	0,24
NC_007795.1	2079267	.	C	T	4221.06	SNP	0,139
NC_007795.1	2079874	.	CT	C	292.02	INDEL	0,10
NC_007795.1	2087725	.	A	T	37448.1	SNP	0,1078
NC_007795.1	2118378	.	G	C	23.64	SNP	4,2
NC_007795.1	2125626	.	T	G	57.64	SNP	2,2
NC_007795.1	2129071	.	C	T	21421.1	SNP	0,623
NC_007795.1	2161696	.	T	A	1835.06	SNP	0,60
NC_007795.1	2163091	.	G	C	676.06	SNP	0,19
NC_007795.1	2163806	.	T	C	16830.1	SNP	0,526
NC_007795.1	2166163	.	G	C	21696.1	SNP	0,516
NC_007795.1	2166183	.	C	A	18893.1	SNP	1433
NC_007795.1	2197215	.	G	A	3240.06	SNP	0,99
NC_007795.1	2207657	.	TC	T	12391	INDEL	1381
NC_007795.1	2221850	.	C	A	1659.06	SNP	0,49
NC_007795.1	2231903	.	T	A	170.64	SNP	13,10
NC_007795.1	2240506	.	A	C	72.64	SNP	1,2
NC_007795.1	2243143	.	ATG	A	114.8	INDEL	0,3
NC_007795.1	2252744	.	G	A	55458.1	SNP	11659
NC_007795.1	2253431	.	A	G	2441.06	SNP	0,74
NC_007795.1	2286872	.	C	CA	104.6	INDEL	28,7
NC_007795.1	2296653	.	TG	T	15974	INDEL	0,395
NC_007795.1	2307536	.	C	A	110691	SNP	263178
NC_007795.1	2321680	.	A	G	16642.1	SNP	1516
NC_007795.1	2323327	.	G	A	23101.1	SNP	0,707
NC_007795.1	2327717	.	A	G	12109.1	SNP	0,375
NC_007795.1	2337948	.	T	C	13414.1	SNP	0,412
NC_007795.1	2352319	.	G	T	5509.06	SNP	0,159
NC_007795.1	2383630	.	G	T	12094.1	SNP	0,341
NC_007795.1	2383660	.	G	T	13641.1	SNP	0,372
NC_007795.1	2384112	.	G	A	7059.06	SNP	0,251
NC_007795.1	2409630	.	T	C	76.64	SNP	29,6
NC_007795.1	2411752	.	G	A	6668.06	SNP	0,199
NC_007795.1	2416105	.	A	G	11928.1	SNP	0,345
NC_007795.1	2424918	.	G	A	3272.06	SNP	0,110
NC_007795.1	2439132	.	A	G	914.06	SNP	0,27
NC_007795.1	2442244	.	C	T	277.64	SNP	31,9
NC_007795.1	2442248	.	C	A	274.64	SNP	32,9
NC_007795.1	2446160	.	TCCC	T	1651.03	INDEL	0,37
NC_007795.1	2446163	.	C	CGA	1606.03	INDEL	0,36
NC_007795.1	2446246	.	C	T	78.32	SNP	0,2
NC_007795.1	2446630	.	C	T	12465.1	SNP	0,283
NC_007795.1	2446641	.	T	A	12644.1	SNP	0,287
NC_007795.1	2459278	.	G	A	12919.1	SNP	0,374
NC_007795.1	2473032	.	T	C	1548.06	SNP	0,51
NC_007795.1	2491908	.	A	G	27148.1	SNP	0,862
NC_007795.1	2543119	.	T	G	3086.06	SNP	0,95
NC_007795.1	2571797	.	C	T	539.04	SNP	1,13
NC_007795.1	2582333	.	T	C	712.06	SNP	0,24
NC_007795.1	2583996	.	CTT	C	48.6	INDEL	9,2
NC_007795.1	2663620	.	G	A	2493.06	SNP	0,73
NC_007795.1	2668972	.	A	G	3961.06	SNP	0,116
NC_007795.1	2678563	.	T	C	3017.06	SNP	0,89
NC_007795.1	2685214	.	T	A	4672.06	SNP	0,182
NC_007795.1	2689048	.	G	T	2798.06	SNP	0,80
NC_007795.1	2705150	.	G	C	32.64	SNP	1,2
NC_007795.1	2745601	.	T	C	41816.1	SNP	31254
NC_007795.1	2762204	.	T	C	99740.1	SNP	52921
NC_007795.1	2782815	.	AC	A	52.28	INDEL	0,2
NC_007795.1	2783147	.	TTTC	T	52.6	INDEL	8,2
NC_007795.1	2792739	.	T	C	877.06	SNP	0,31
NC_007795.1	2808623	.	C	T	632.06	SNP	0,18
NC_007795.1	2810581	.	A	G	591.06	SNP	0,18
